# Supplementary material for: Evaluation of the Environmental Impact and Efficiency of N-Doping Strategies in the Synthesis of Carbon Dots
Source: PubMed Central journal article supplement (PMC7040597; doi:10.3390/ma13030504), 2020-01-21
Supplement: materials-13-00504-s001.pdf [file materials-13-00504-s001.pdf]

Article

# Evaluation of the Environmental Impact and Efficiency of N-Doping Strategies in the Synthesis of Carbon Dots

Suzanne Christé <sup>1</sup>, Joaquim C.G. Esteves da Silva <sup>1,2</sup> and Luís Pinto da Silva <sup>1,2,\*</sup>

<sup>1</sup> Chemistry Research Unit (CIQUP), Faculty of Sciences of University of Porto, R. Campo Alegre 697, 4169–007 Porto, Portugal; christe.suzanne@gmail.com (S.C.); jcsilva@fc.up.pt (J.E.d.S.)

<sup>2</sup> LACOMEPHI, GreenUPorto, Department of Geosciences, Environment and Territorial Planning, Faculty of Sciences of University of Porto, R. Campo Alegre 697, 4169–007 Porto, Portugal.

\* Correspondence: luis.silva@fc.up.pt.

Received: 03 January 2020; Accepted: 16 January 2020; Published: date

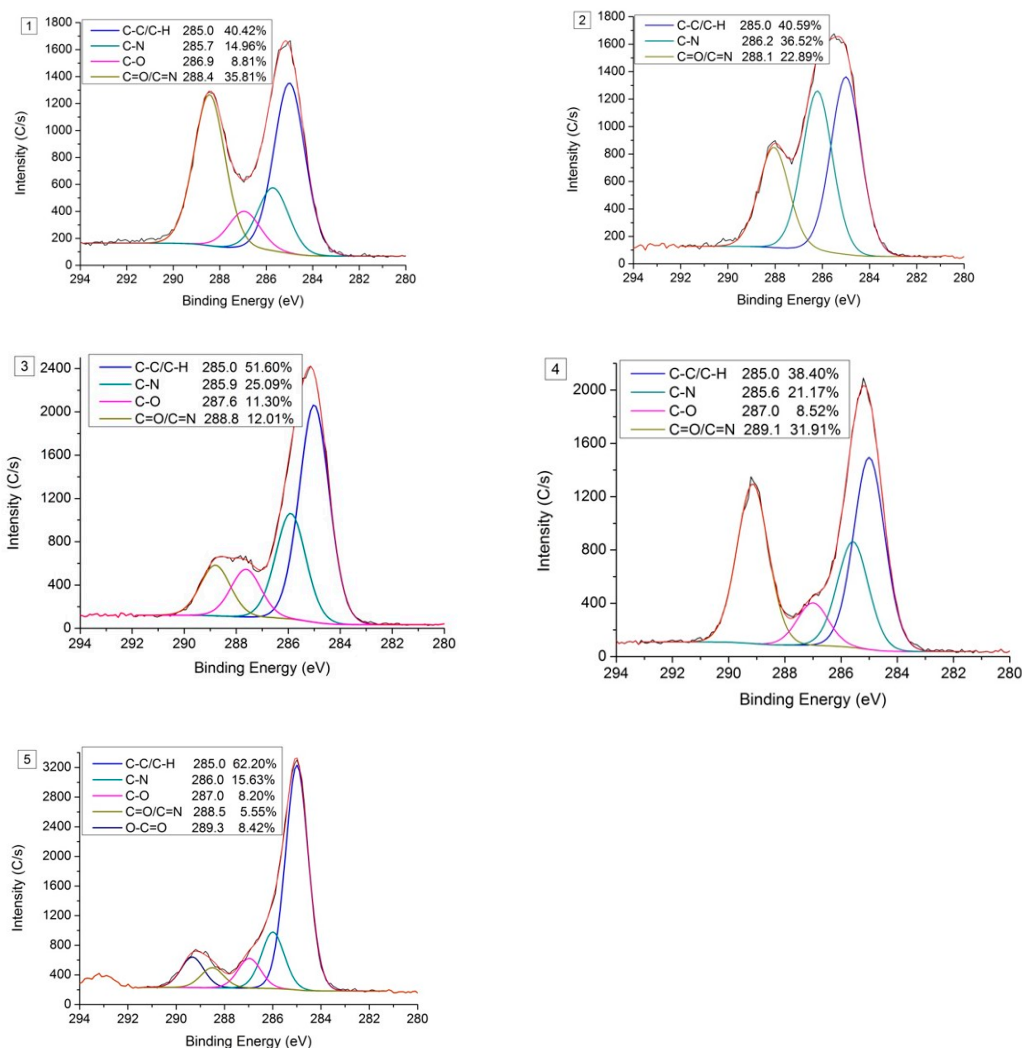

Figure S1. Detailed XPS spectra of C 1s (Carbon dots 1 to 5).

Table S1. Contributions (%) to C 1s peaks after deconvolution (CasaXPS software).

| C 1s bond (BE)    | 1  | 2  | 3  | 4  | 5  |
|-------------------|----|----|----|----|----|
| C-C/C-H (~285 eV) | 40 | 41 | 52 | 38 | 62 |

|                      |    |    |    |    |    |
|----------------------|----|----|----|----|----|
| C-N<br>(~286 eV)     | 15 | 37 | 25 | 21 | 16 |
| C-O<br>(~287 eV)     | 9  | -  | 11 | 9  | 8  |
| C=O/C=N<br>(~288 eV) | 36 | 23 | 12 | 32 | 6  |
| O-C=O (~289 eV)      | -  | -  | -  | -  | 8  |

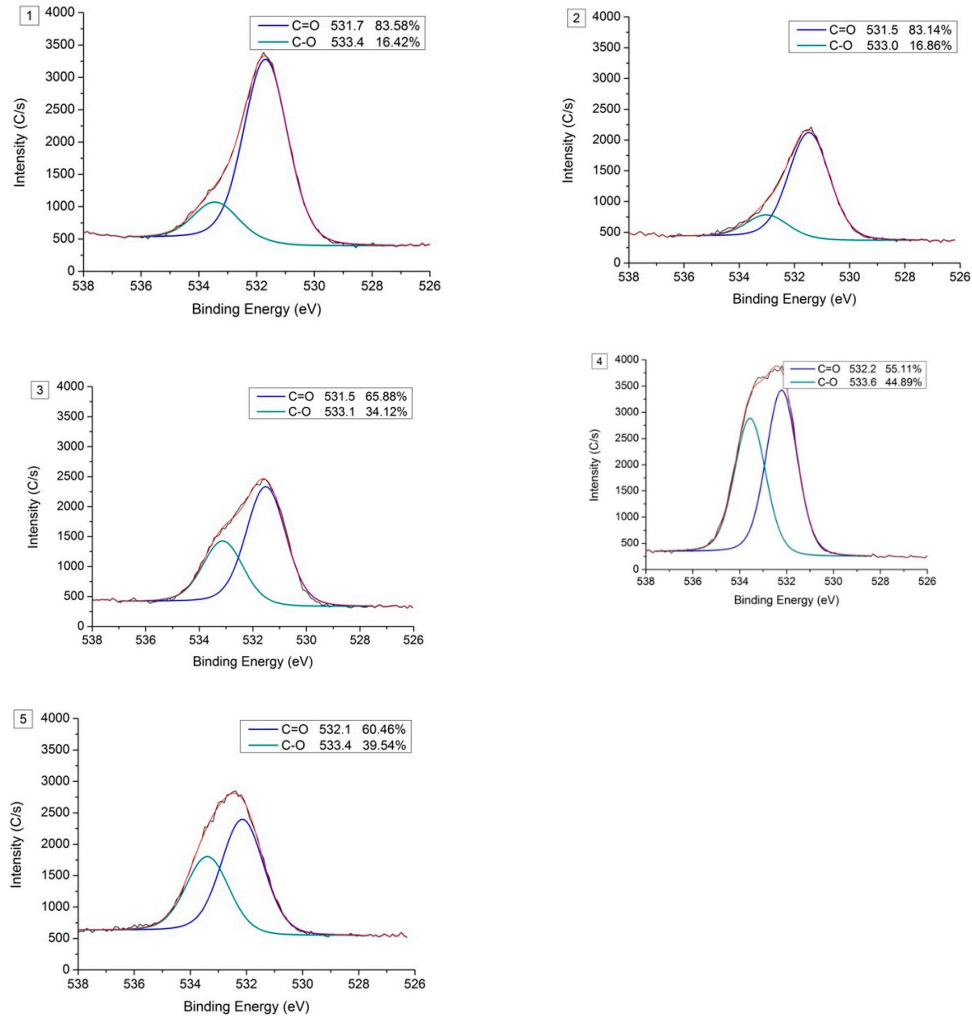

Figure S2. Detailed XPS spectra of O 1s (Carbon dots 1 to 5).

Table S2. Contributions (%) to O 1s peaks after deconvolution (CasaXPS software).

| O 1s bond (BE) | 1  | 2  | 3  | 4  | 5  |
|----------------|----|----|----|----|----|
| C=O (~532 eV)  | 84 | 83 | 66 | 55 | 60 |
| C-O (~533 eV)  | 16 | 17 | 34 | 45 | 40 |

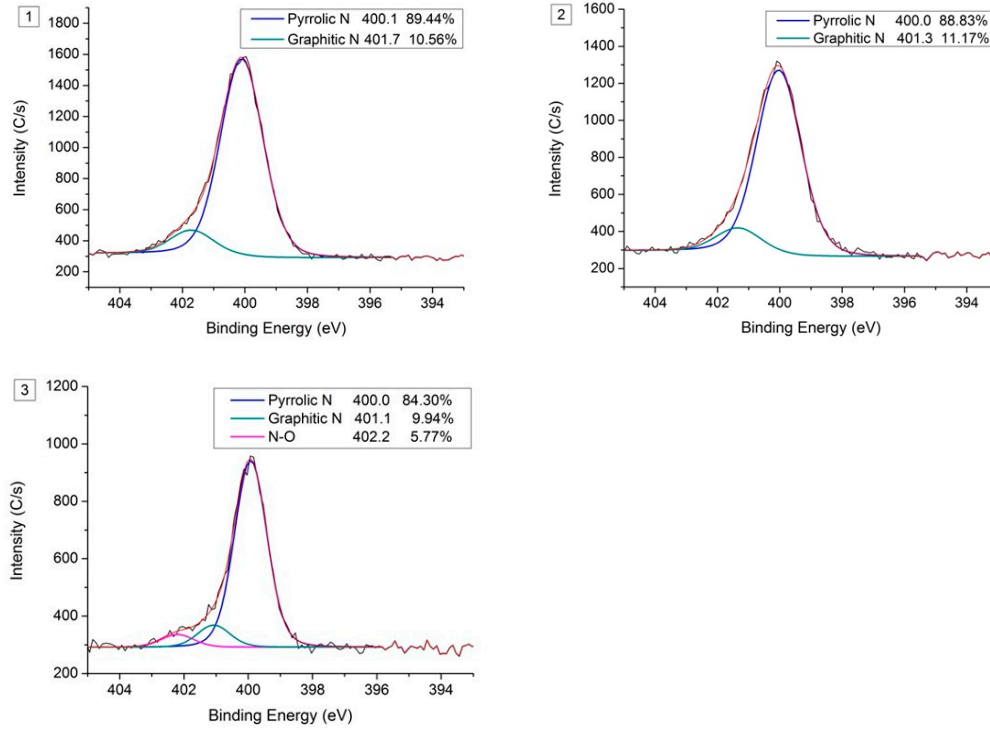

**Figure S3.** Detailed XPS spectra of N 1s (Carbon dots 1 to 3).

**Table S3.** Contributions (%) to N 1s peaks after deconvolution (CasaXPS software).

| N 1s bond (BE)          | 1  | 2  | 3  |
|-------------------------|----|----|----|
| Pyrrolic N (~400 eV)    | 89 | 89 | 84 |
| Graphitic N (~401.5 eV) | 11 | 11 | 10 |
| N-O (~402 eV)           | -  | -  | 6  |

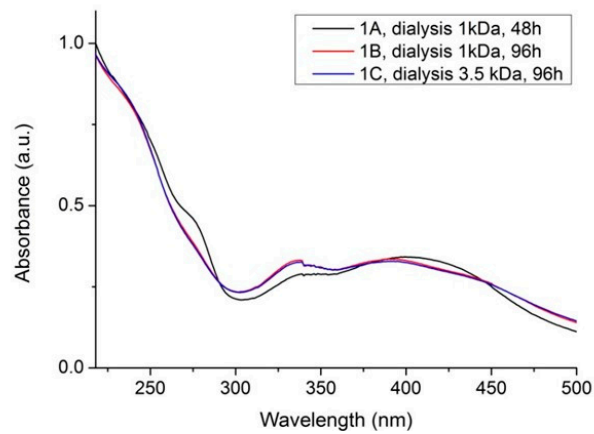

**Figure S4.** Absorbance spectra of carbon dots 1A, 1B and 1C.

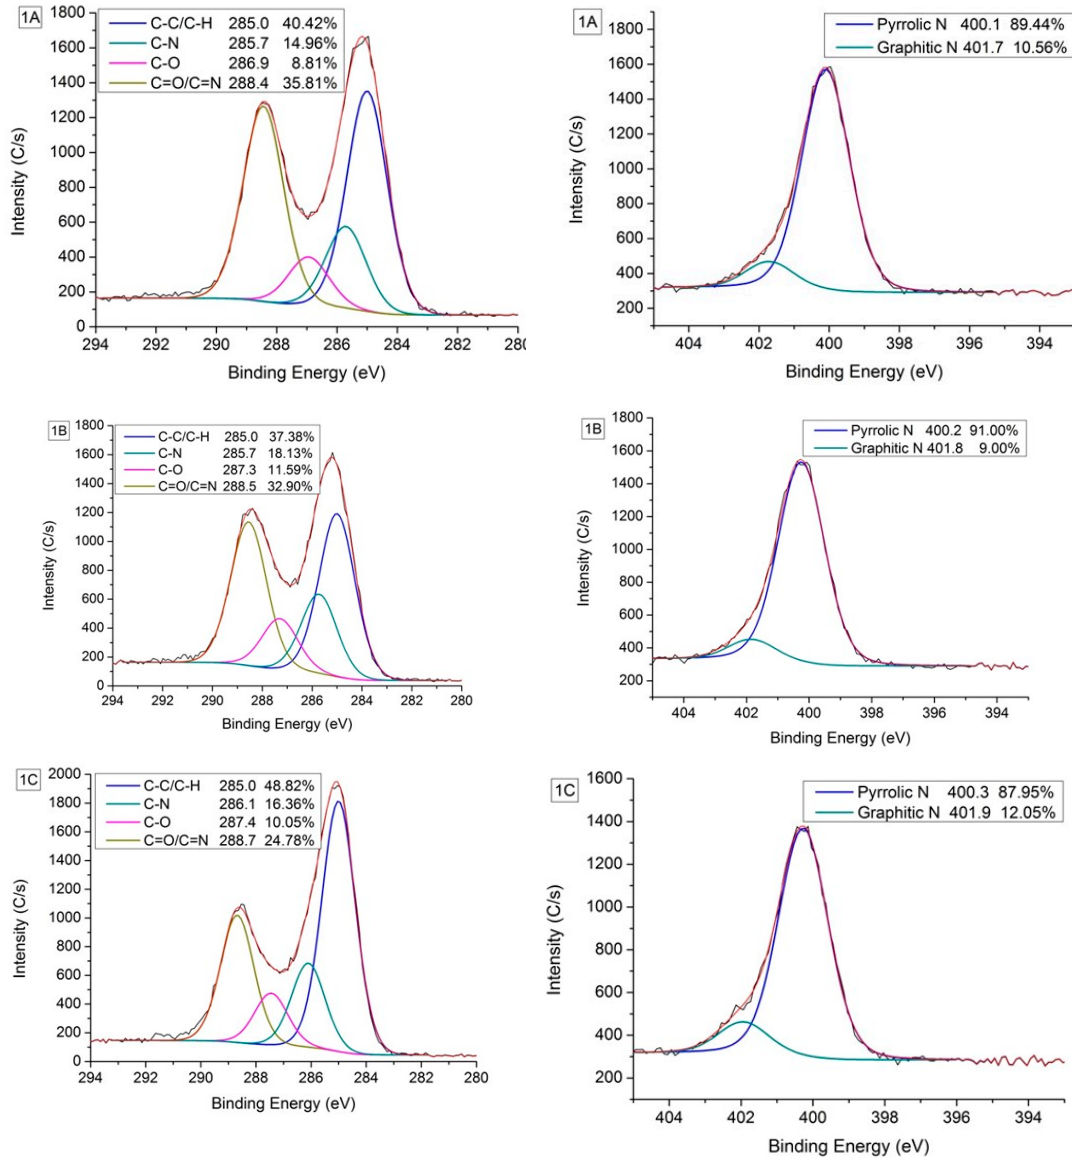

**Figure S5.** XPS spectra C 1s (left) and N 1s (right) for carbon dots 1A, 1B and 1C.

**Table S4.** Quantity of products required for the production of 1 kg of CDs (SimaPro software).

| Carbon dots | Citric acid (kg) | Nitrogen source (kg) | Deionized water (kg) | Electricity (MJ) |
|-------------|------------------|----------------------|----------------------|------------------|
| 1B          | 35               | 35                   | 357                  | 174              |
| 2           | 7.2              | 7.2                  | 77.9                 | 87.1             |
| 3           | 22.9             | 217                  | 5.5                  | 87.1             |
| 4           | 13.7             | 108                  | 5.5                  | 87.1             |
| 5           | 278              | 2720                 | 5.5                  | 87.1             |

**Table S5.** Fluorescence quantum yields ( $Q_{Y_{FL}}$ ) and  $Q_{Y_{FL}}$ -based functional units.

| Carbon dots | $Q_{Y_{FL}}$ (%) | $Q_{Y_{FL}}$ -based functional unit (using 1B as reference) |
|-------------|------------------|-------------------------------------------------------------|
| 1B          | 3.5              | 1.0                                                         |

|   |     |     |
|---|-----|-----|
| 2 | 3.1 | 1.1 |
| 3 | 3.5 | 1.0 |
| 4 | 2.4 | 1.5 |
| 5 | 2.3 | 1.5 |

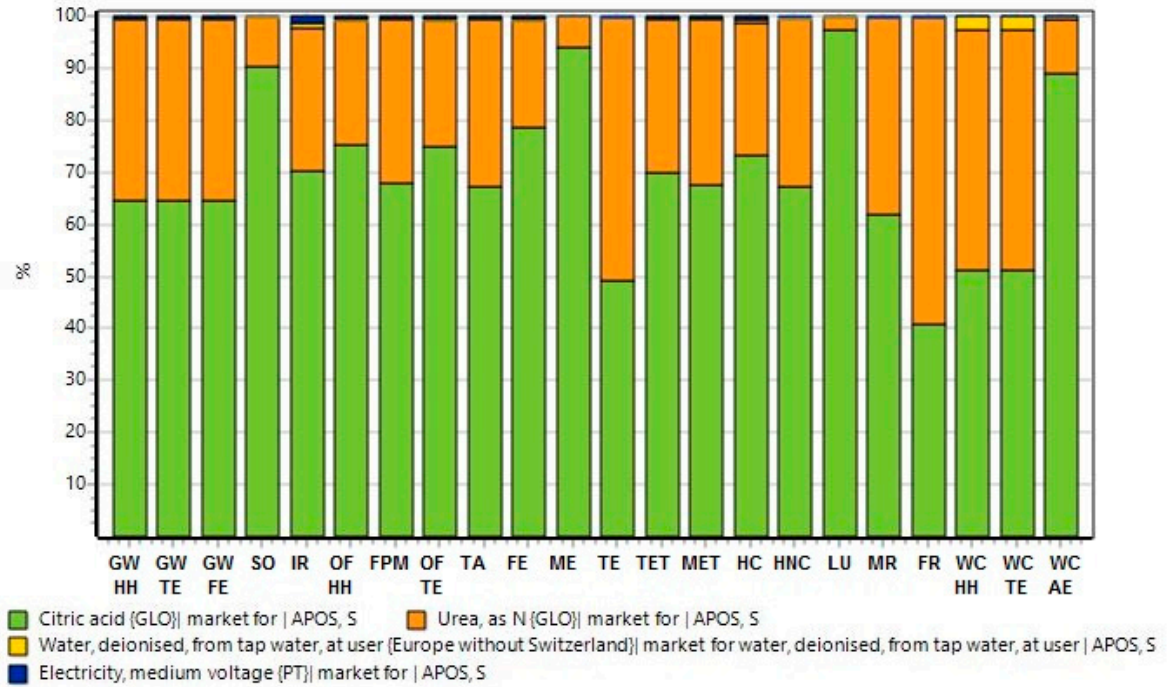

(A)

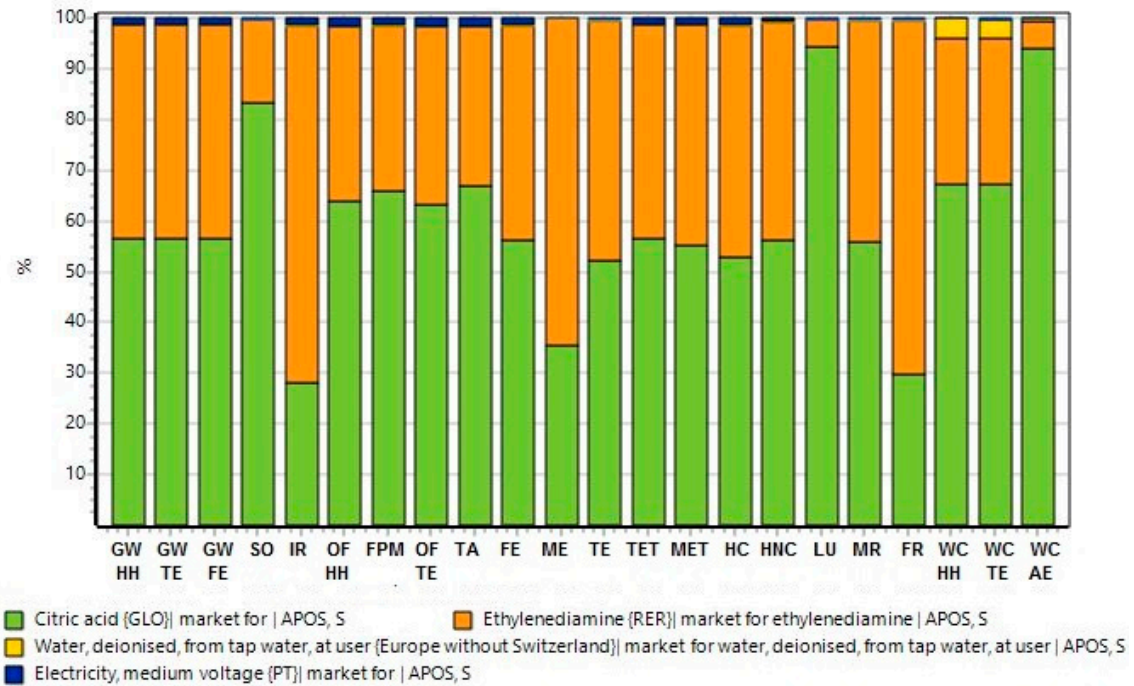

(B)

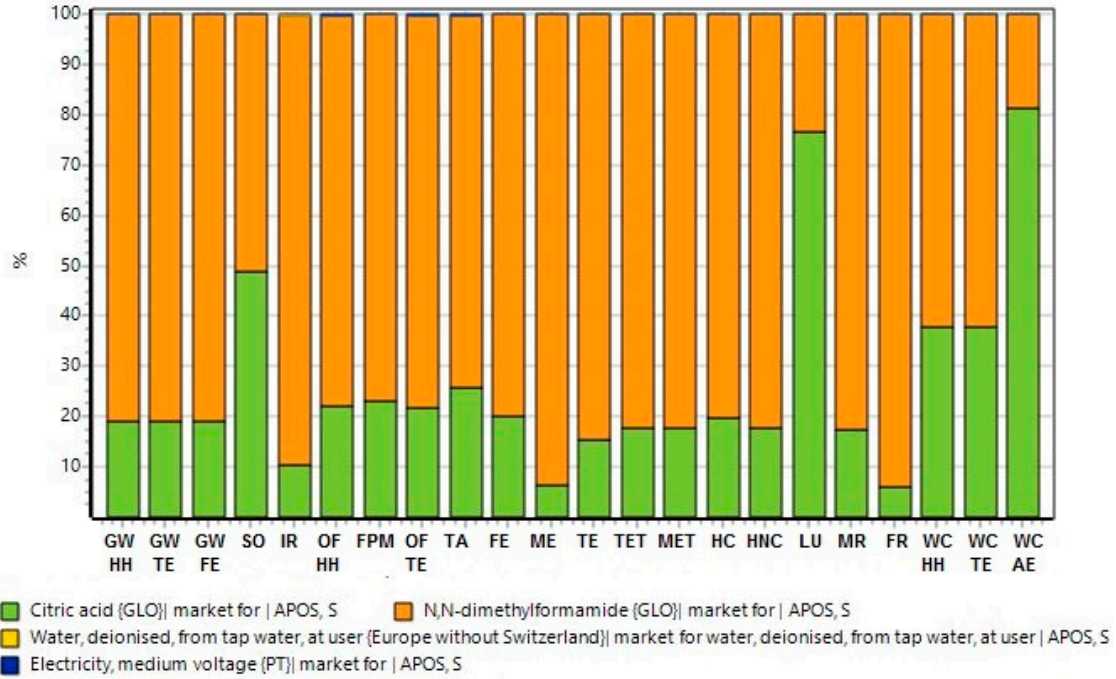

(C)

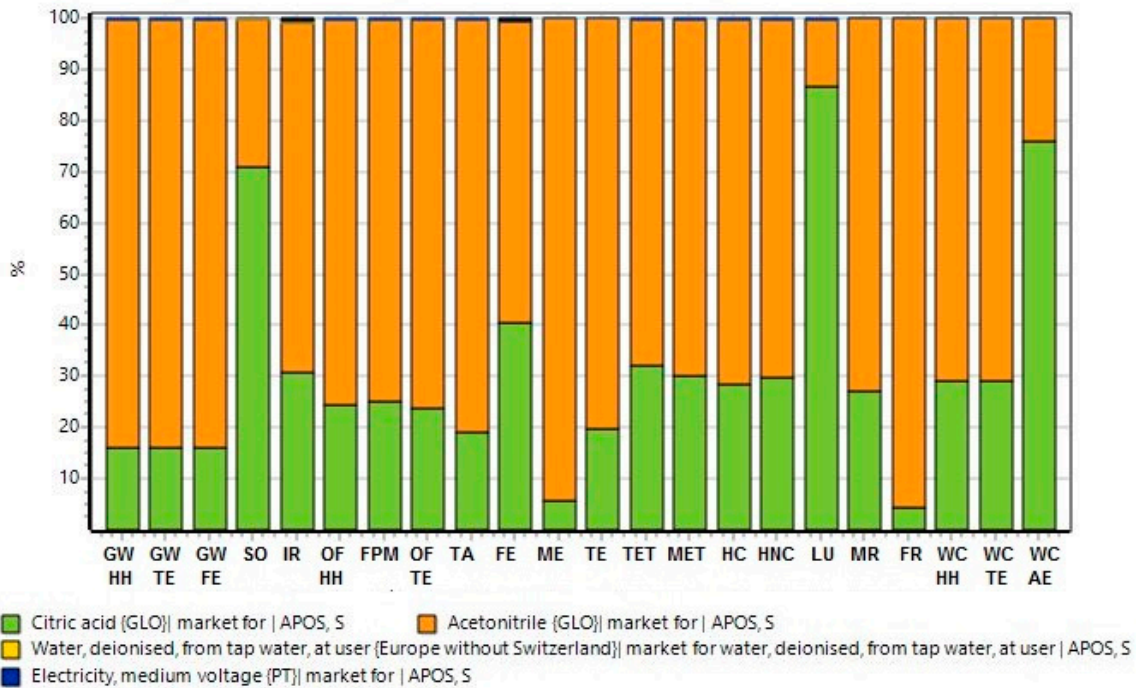

(D)

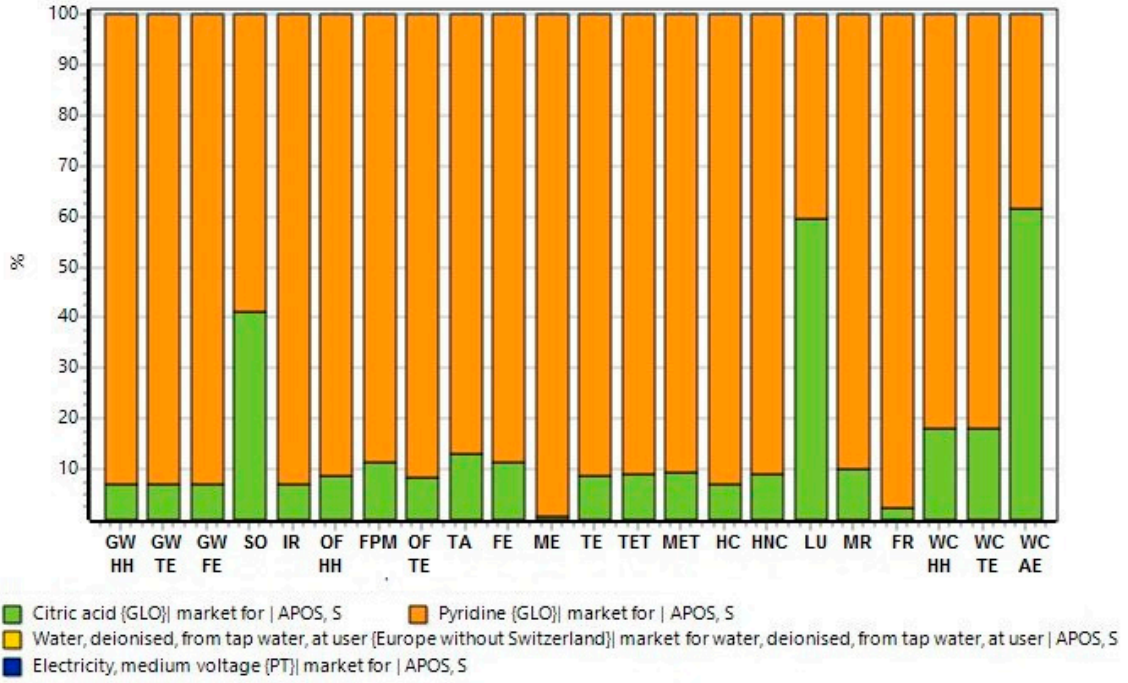

(E)

**Figure S6:** Relative environmental impacts of each carbon dots solution with the ReCiPe2016 LCIA for: (A) CD<sub>s</sub> 1B, (B) CD<sub>s</sub> 2, (C) CD<sub>s</sub> 3, (D) CD<sub>s</sub> 4 and (E) CD<sub>s</sub> 5.
